# Supplementary material
Source: PubMed Central journal article supplement (PMC7132136)
Supplement: pnas.1920911117.sapp.pdf [file pnas.1920911117.sapp.pdf]

1 **Supplementary Information**

2  
3 **All-nanofiber-based, ultrasensitive, gas-permeable mechanoacoustic sensors for**  
4 **continuous long-term heart monitoring**

5 Md Osman Goni Nayeem<sup>a</sup>, Sunghoon Lee<sup>a</sup>, Hanbit Jin<sup>a</sup>, Naoji Matsuhisa<sup>a</sup>, Hiroaki  
6 Jinno<sup>a,b</sup>, Akihito Miyamoto<sup>a</sup>, Tomoyuki Yokota<sup>a</sup>, and Takao Someya<sup>a,b,c\*</sup>

7  
8 <sup>a</sup> Department of Electrical Engineering and Information Systems, School of Engineering,  
9 The University of Tokyo, 7-3-1 Hongo, Bunkyo-ku, Tokyo 113-8656, Japan

10 <sup>b</sup> Center for Emergent Matter Science (CEMS), RIKEN, 2-1 Hirosawa, Wako, Saitama  
11 351-0198, Japan

12 <sup>c</sup> Thin-Film Device Laboratory, RIKEN, 2-1 Hirosawa, Wako, Saitama 351-0198, Japan

13  
14 \* All correspondence should be sent to someya@ee.t.u-tokyo.ac.jp.

15  
16 **This supplementary information contains:**

17 **Supplementary Notes, Supplementary Figures S1-S16, Supplementary Table S1,**

18 **List of Supplementary Movies (S1 and S2), and Supplementary References (1-2).**

19 **Supplementary Notes:**

20 **Reason of using PU with coated metal layer as electrodes:**

21 For on skin sensors, softness is required along with the conductivity. Therefore, we have  
22 chosen soft polymer (PU) nanofibers with 100-nm-thick Au layer. PU nanofibers sheet  
23 exhibits sufficiently low effective Young's modulus of  $0.274 \pm 0.039$  MPa (ref 44 in the  
24 manuscript), compared to that of plasticized carbon fibers sheet (0.2–0.8 GPa, ref 1 in SI).  
25 Furthermore, the conductivity of 100 nm thick Au layer on PU nanofibers is sufficiently  
26 high (sheet resistance,  $2.293 \pm 0.069 \Omega$ ) to generate piezo-/triboelectricity signals.

27

28 **Effect of electrode coverage area**

29 To quantify the covered area by PU nanofiber, we have analyzed the SEM image (Figure  
30 S6). Maximum coverage area is plotted as a function of electrospinning time. We have  
31 used low density PU nanofiber layer coated by Au (max. coverage area 39.07%) as  
32 electrode layers.

33 For triboelectric sensors, higher contact area can increase the charge generation. On the  
34 other hand, higher opening area decreases the air damping effect which enables the larger  
35 vibration of the sensors (ref 2 in SI, ref 29 in the manuscript). These effects are in trade-  
36 off. In this time, we optimized the density of PU nanofiber layer, and used low density  
37 PU nanofiber layer coated by Au (max. coverage area 39.07%) as electrode layers to  
38 achieve the highest signals.

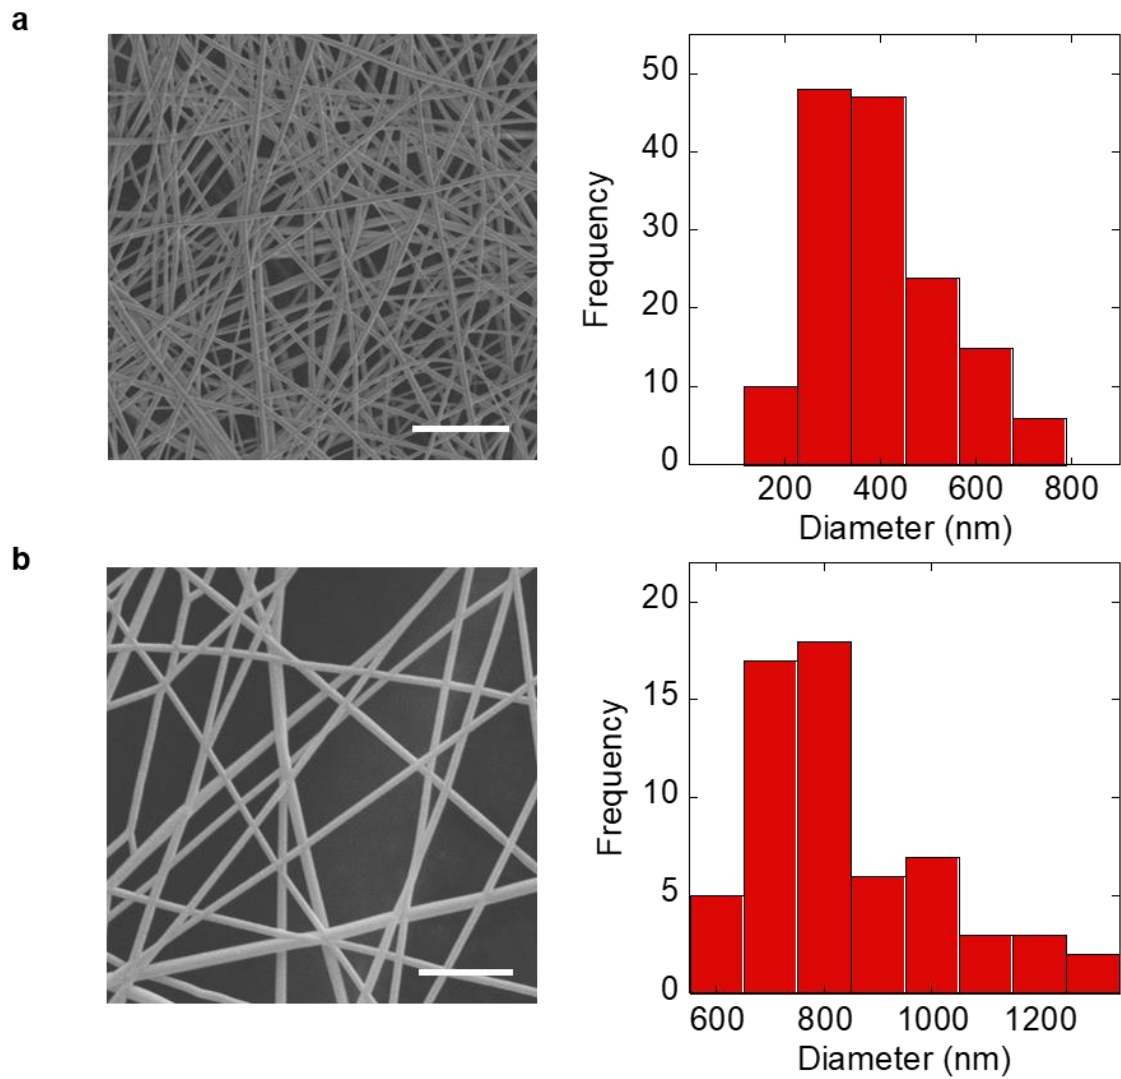

39

40 **Figure S1**

41 **SEM image of electrospun nanofibers, and diameter distribution a, PVDF nanofiber**

42 (e-spinning condition: 19 wt%, 20 kV and 10  $\mu$ L/min). **b, Parylene coated PU nanofiber**

43 (e-spinning condition: 15 wt%, 20 kV and 10  $\mu$ L/min). Scale bar, 10  $\mu$ m.

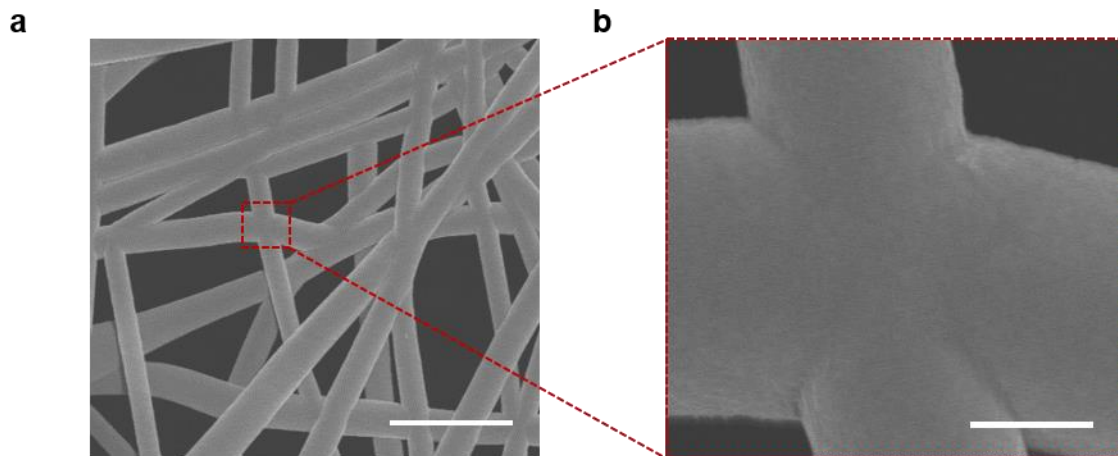

44

45 **Figure S2**

46 Surface SEM image of **a**, parylene coated PU nanofiber. Scale bar, 5  $\mu\text{m}$ . **b**, 10x

47 magnified image showing stronger fiber-to-fiber joint due to thin layer of parylene

48 coating. Scale bar, 500 nm.

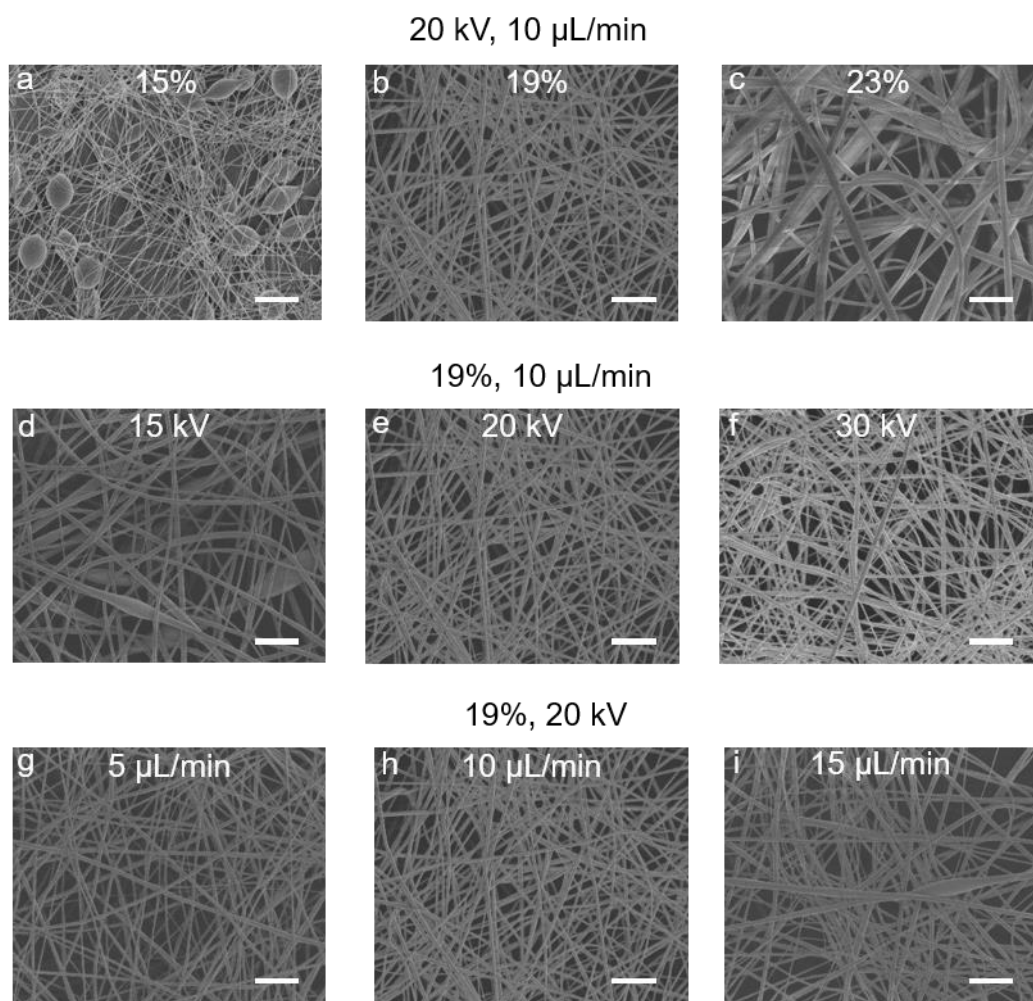

49

50

**Figure S3**

51

**Surface SEM images of PVDF nanofibers at various electrospinning conditions.**

52

**PVDF nanofiber fabrication conditions were optimized by varying electrospinning**

53

**conditions. a-c, Variation of solution concentration (20 kV, 10 μL/min) d-f, Variation of**

54

**applied voltage (19wt%, 10 μL/min) and g-i, Variation of pumping rate (19 wt%, 20**

55

**kV). Scale bar, 10 μm.**

56

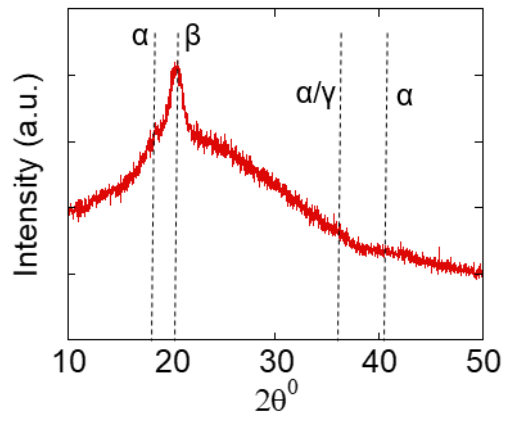

57

58 **Figure S4**

59 **XRD pattern of PVDF nanofibers.** Peak at  $2\theta \approx 20.2^\circ$ , which corresponds to  
60 diffraction in (110) plane and represents the  $\beta$ -phase formation.

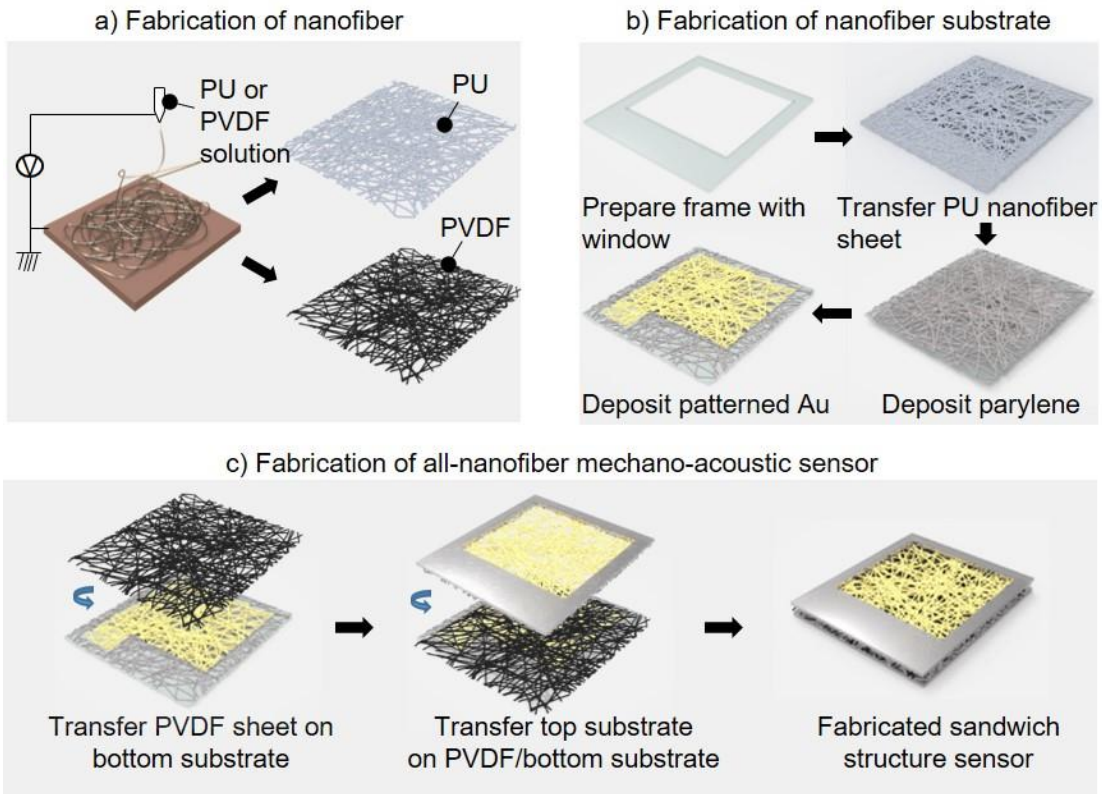

61

62 **Figure S5**

63 **Schematic illustration of device fabrication process. a**, Fabrication of nanofiber using

64 electrospinning method **b**, Fabrication of nanofiber substrate **c**, Fabrication of final

65 sensor by transfer method.

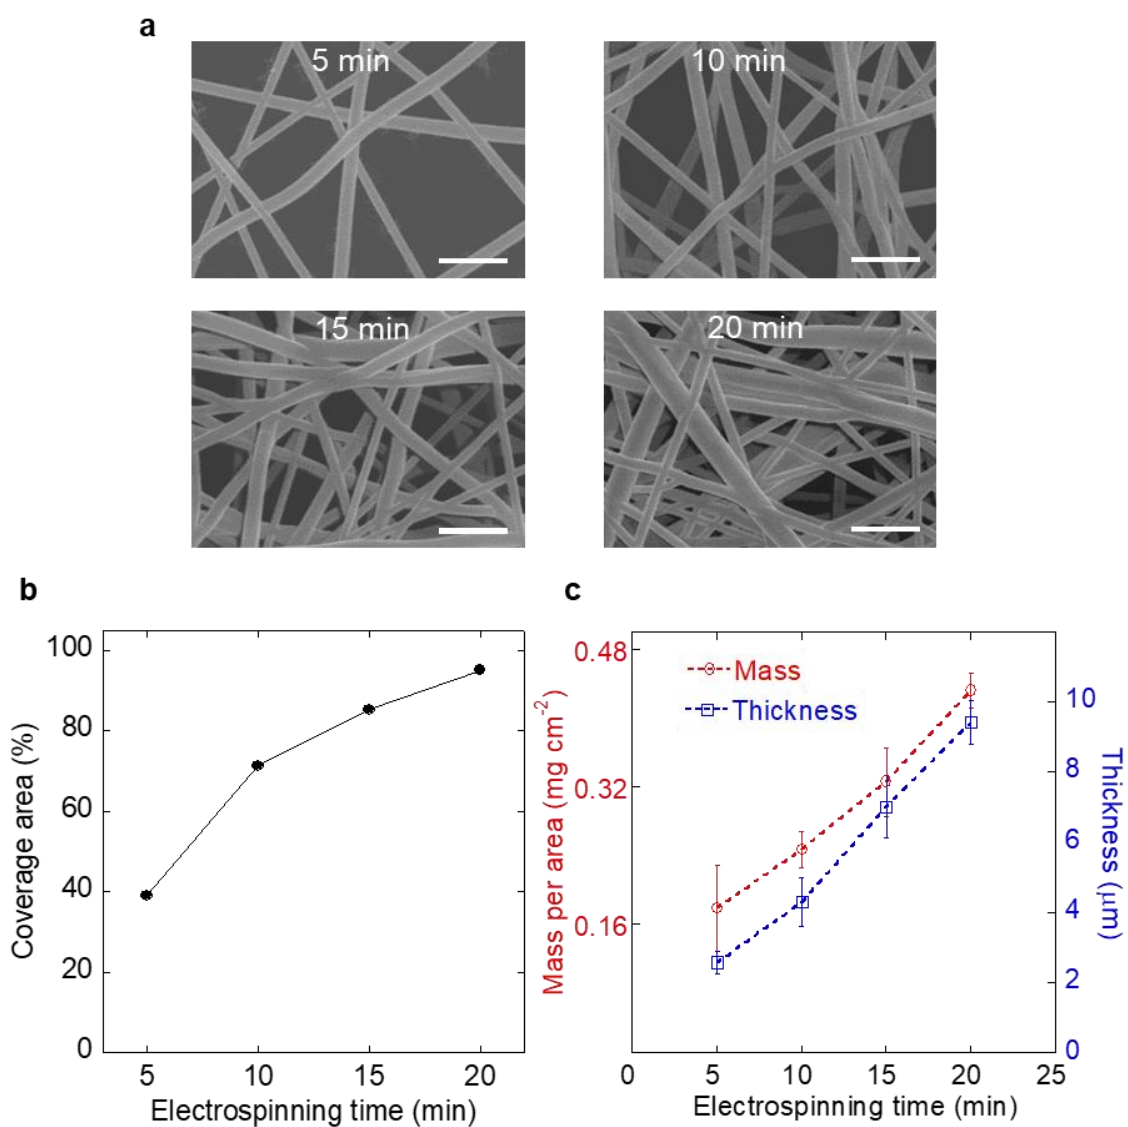

66

67 **Figure S6**

68 **Light-weight feature of all-nanofiber sensor. a**, SEM image of nanofiber substrates at

69 different electrospinning time. Scale bar, 5  $\mu\text{m}$ . **b**, Maximum coverage area (percentage)

70 as a function of electrospinning time. **c**, Mass and thickness of nanofiber substrate as

71 function of electrospinning time ( $n = 3$ ). Red curve represents mass and blue represents

72 thickness.



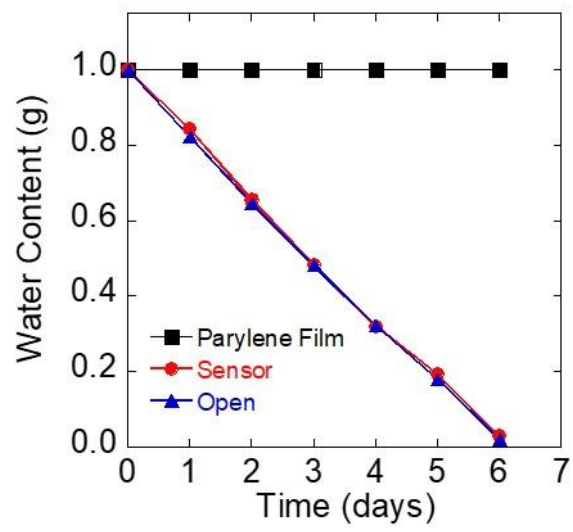

73

74 **Figure S7**

75 **Gas-permeability of all-nanofiber mechanoacoustic sensor.**

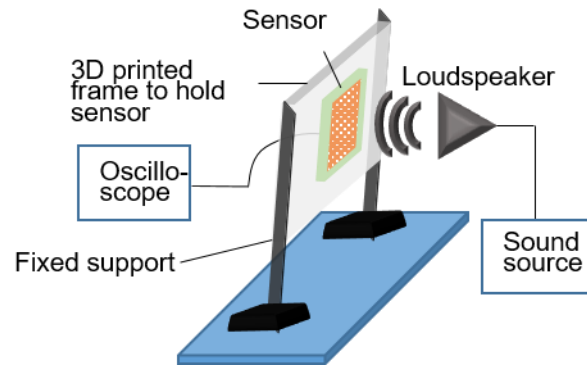

76

77 **Figure S8**

78 **Experimental setup for the characterization of all-nanofiber mechano-acoustic**

79 **sensor.**

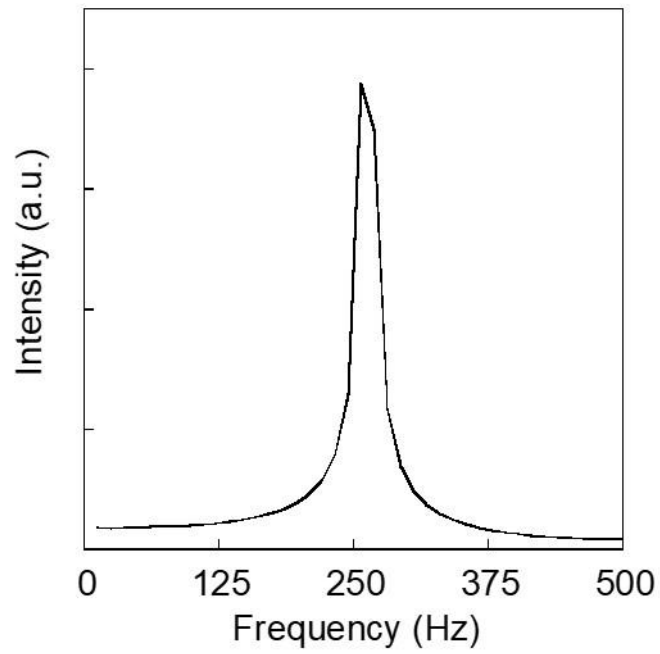

80

81 **Figure S9**

82 **FFT pattern of generated voltage signal when sound waves of 250 Hz at 110 dB is**

83 **applied to sensor.**

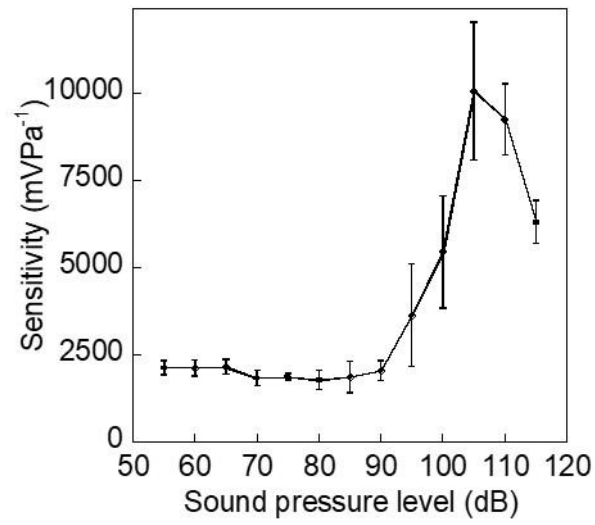

84

85 **Figure S10**

86 **Sensitivity of all-nanofiber mechano-acoustic sensor over a wide range of sound**

87 **pressure level (SPL) (n = 3).**

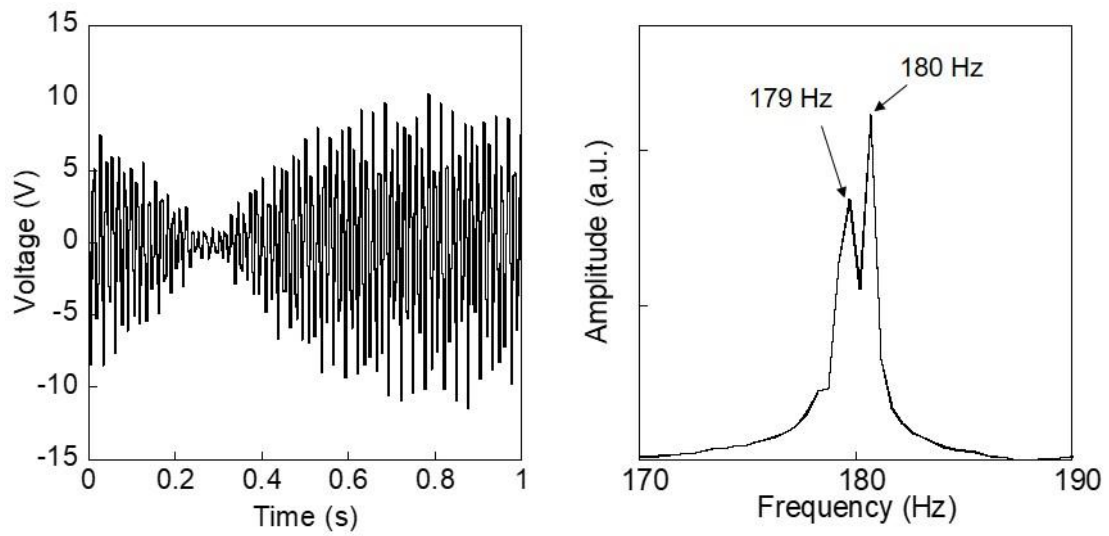

88

89 **Figure S11**

90 **Voltage waveform when two signals with closer frequency (179 and 180 Hz) are**  
91 **applied to sensor (left) and corresponding FFT pattern (right). Sensors can**  
92 **differentiate two signals of 1 Hz gap showing very high resolution of frequency**  
93 **differentiation.**

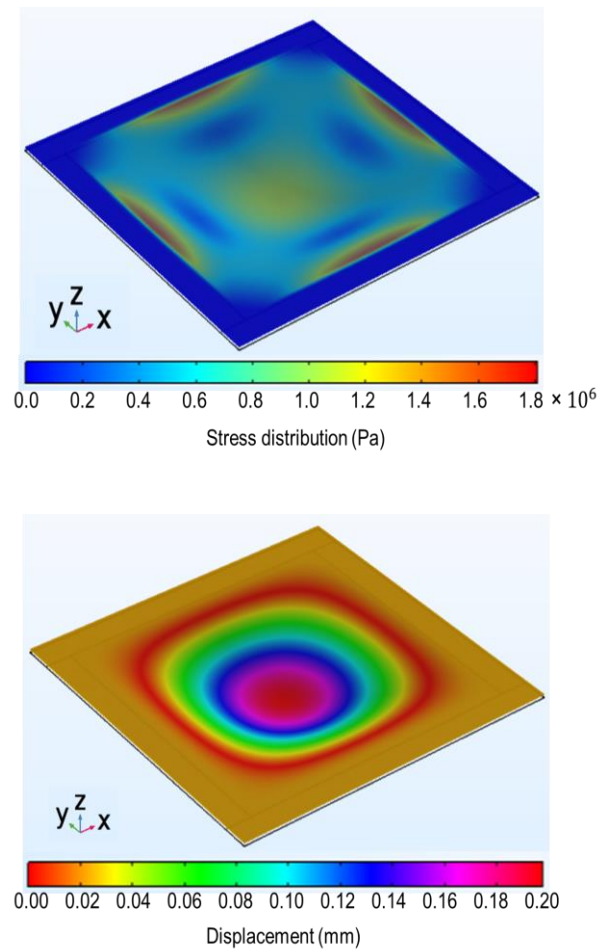95 **Figure S12**

96 **Simulation of device vibration when sound waves of fixed frequency and SPL is**  
 97 **applied (COMSOL Multiphysics 3.5a). Distribution of stress (top) and**  
 98 **total displacement (bottom) of devices due to the application of sound waves at**  
 99 **250 Hz. Each nanofiber layer is considered as low density film layer. The**  
 100 **parameters used for PVDF layer and substrate layers are as follows; PVDF:**  
 101 **density =  $450 \text{ Kg m}^{-3}$ , Poisson's ratio = 0.42 and Young's modulus = 1.5 GPa;**  
**Substrates: density = 1420**

102 **kg m<sup>-3</sup>, Poisson's ratio = 0.34 and Young's modulus = 2.5 GPa. The sound source is**  
103 **considered as a point source located 1 cm away from the sensor.**

104

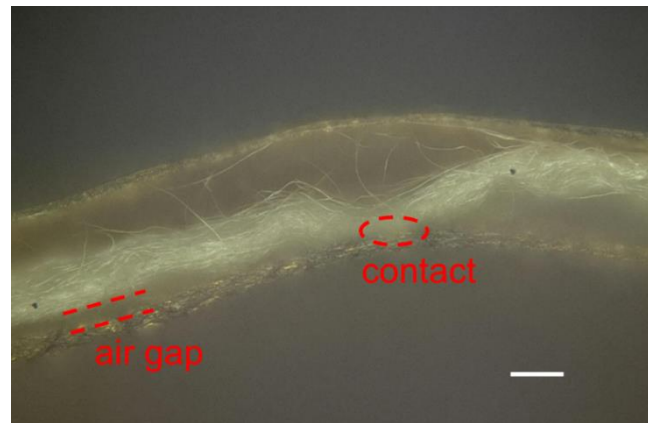

105 **Figure S13**

106 **Microscopic cross-section of all-nanofiber mechano-acoustic sensors. Scale bar, 10**  
107 **μm.**

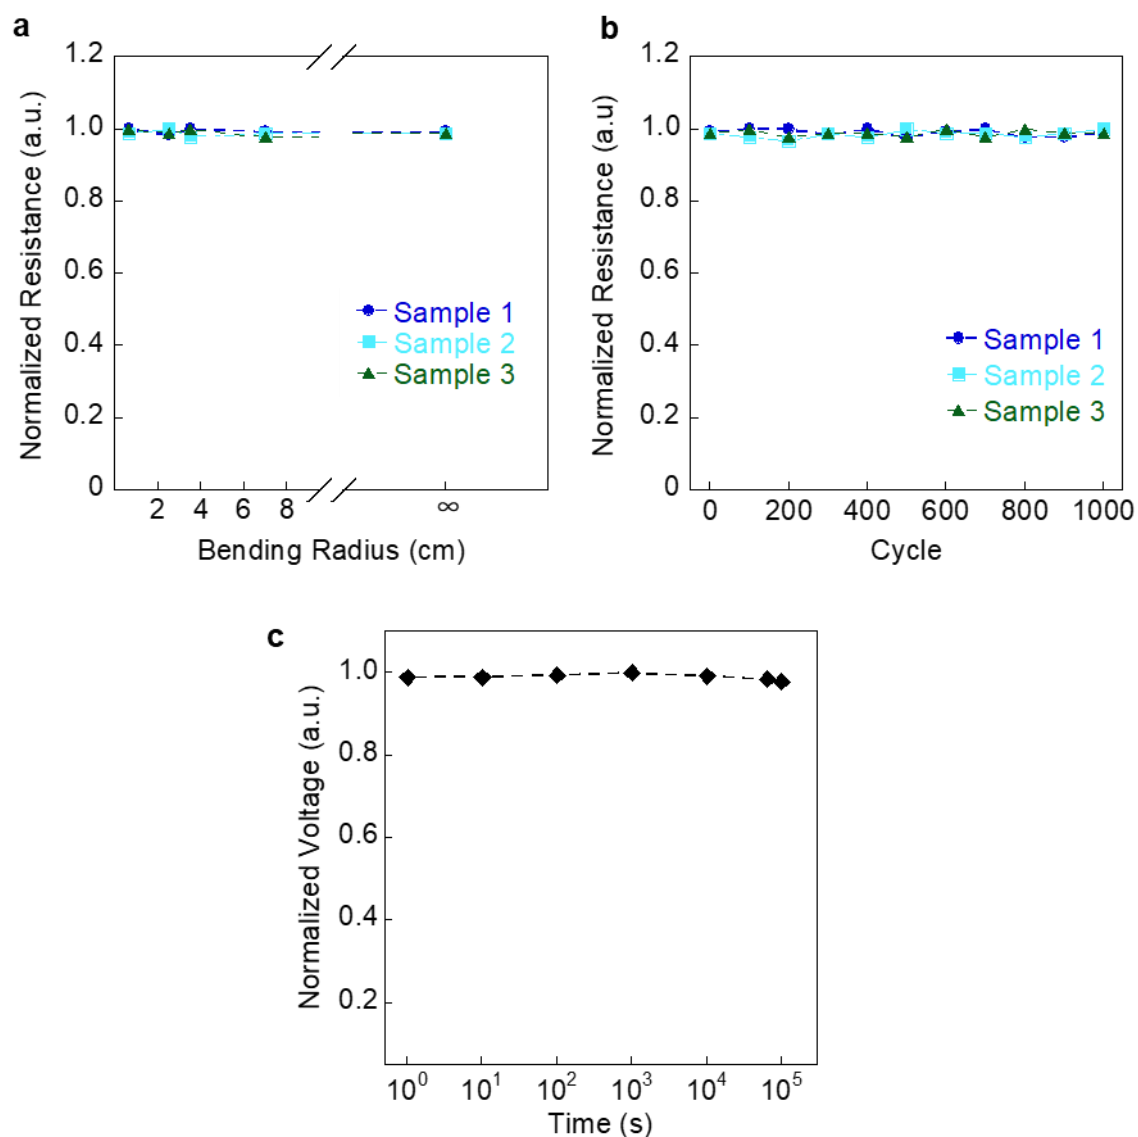

108

109 **Figure S14**

110 **a**, Normalized resistance at different bending radii, ranging from the flat state ( $\infty$ ) to a 6.5

111 mm bending radius. **b**, Cyclic durability of up to 1000 repetitive bending cycles (bending

112 radius, 6.5 mm). **c**, Long-term stability of sensor when a sound wave (250 Hz and 110

113 dB) is applied continuously for 27 h.



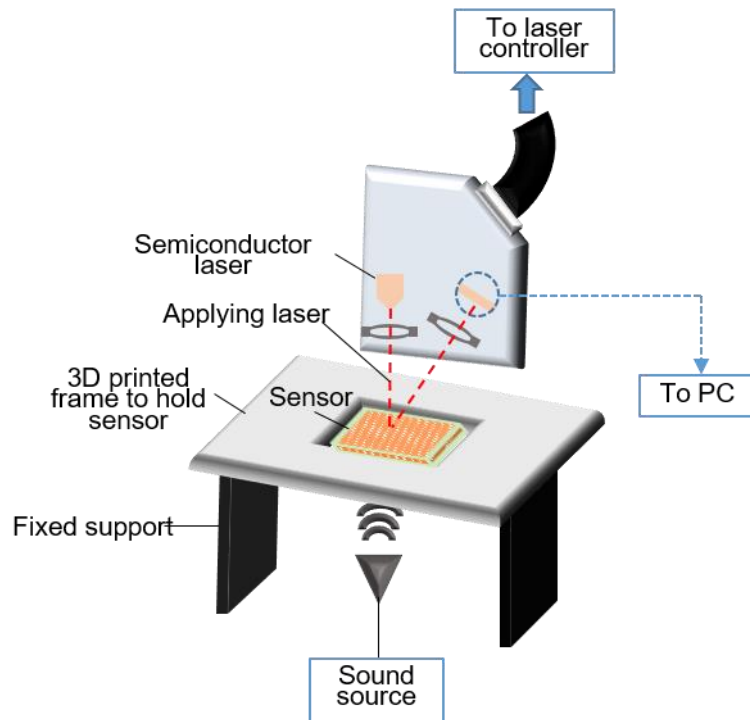

114

115 **Figure S15**

116 **Experimental setup for the measurement of vibration amplitude of sensors.**

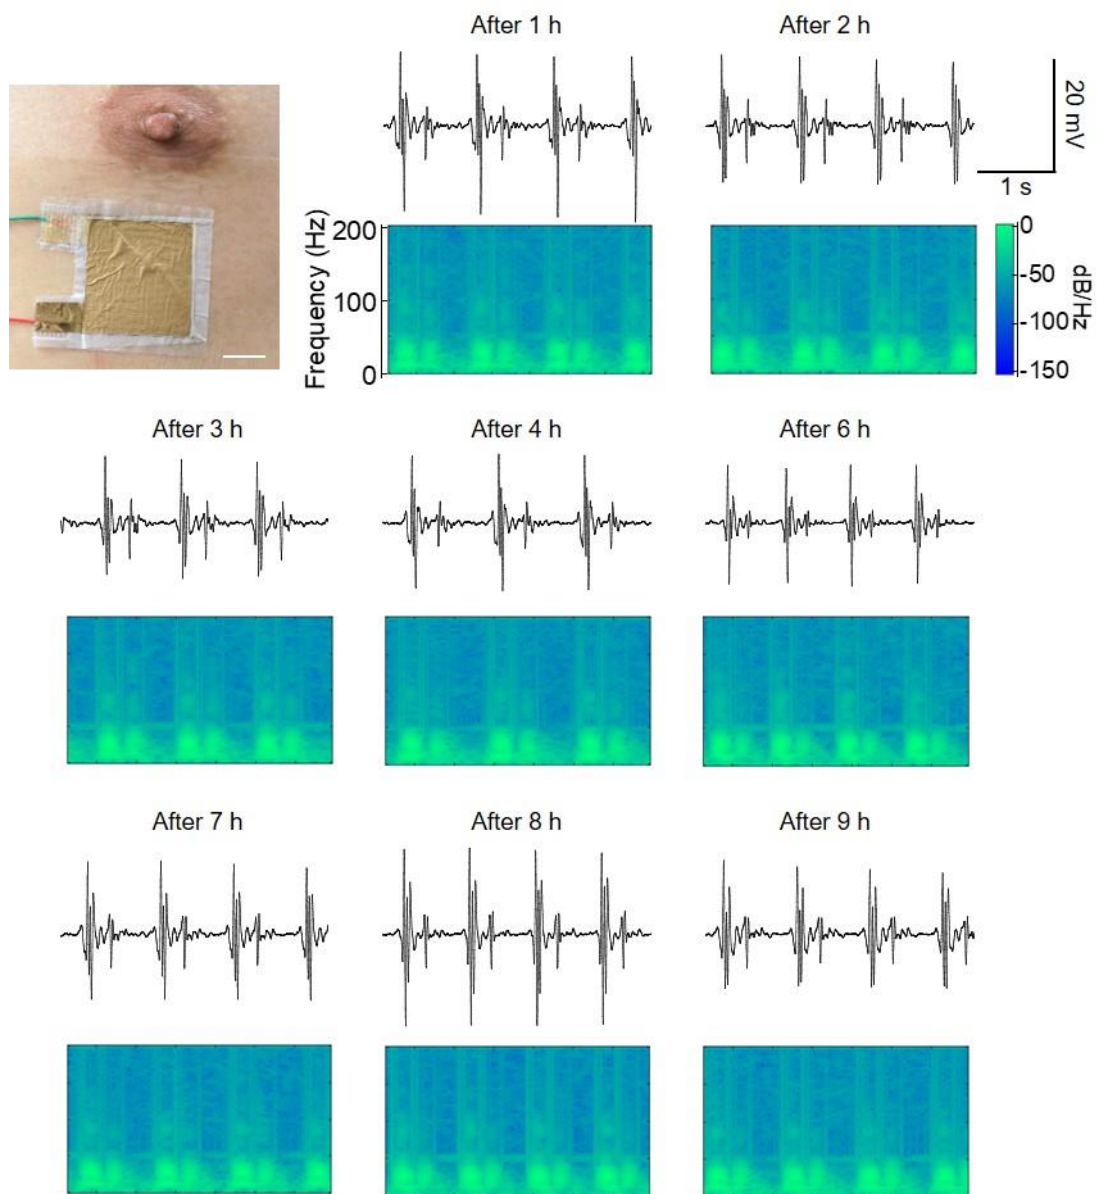

117

118 **Figure S16**

119 **Optical photo of sensor attached at the mitral valve position of human chest for long-**

120 **term seismocardiography. Scale bar, 1 cm. Mechano-acoustic heart signals (after 1**

121 **h, after 2 h, after 3 h, after 4 h, after 6 h, after 7 h, after 8 h and after 9 h), and the**

122 **corresponding spectrograms.**

123 **Table S1.** A comparison of water-vapor permeability of nanofiber-based devices

| References                                                                                                                                                                                                                                     | Water-vapor permeability<br>(Kg m <sup>-2</sup> d <sup>-1</sup> ) |
|------------------------------------------------------------------------------------------------------------------------------------------------------------------------------------------------------------------------------------------------|-------------------------------------------------------------------|
| Y. Li, F. Yang, J. Yu, B. Ding, Hydrophobic Fibrous Membranes with Tunable Porous Structure for Equilibrium of Breathable and Waterproof Performance. <i>Adv. Mater. Interfaces</i> <b>3</b> , 1600516 (2016).                                 | 11.9                                                              |
| J. Sheng, M. Zhang, Y. Xu, J. Yu, B. Ding, Tailoring Water-Resistant and Breathable Performance of Polyacrylonitrile Nanofibrous Membranes Modified by Polydimethylsiloxane. <i>ACS Appl. Mater. Interfaces</i> <b>8</b> , 27218–27226 (2016). | 12.5                                                              |
| F. Yang, et al., Hydrophobic polyvinylidene fluoride fibrous membranes with simultaneously water/windproof and breathable performance. <i>RSC Adv.</i> <b>6</b> , 87820–87827 (2016).                                                          | 11.5                                                              |
| Z. Li, et al., All-Fiber Structured Electronic Skin with High Elasticity and Breathability. <i>Adv. Funct. Mater.</i> <b>30</b> , 1908411, 1–9 (2019).                                                                                         | 10.3                                                              |
| A. Miyamoto, et al., Inflammation-free, gas-permeable, lightweight, stretchable on-skin electronics with nanomeshes. <i>Nat. Nanotechnol.</i> <b>12</b> , 907–913 (2017).                                                                      | 10.7                                                              |
| <b><u>This work</u></b>                                                                                                                                                                                                                        | <b><u>12.4</u></b>                                                |

124

125

126 **List of Supplementary Movies**

127 **Movie S1**

128 Observation of the real-time vibration and the contact-separation between the layers of  
129 the sensor using high-speed camera under the application of sound waves (100 Hz)  
130 (normal speed).

131 **Movie S2**

132 Observation of the real-time vibration and the contact-separation between the layers of  
133 the sensor using high-speed camera under the application of sound waves (100 Hz) (10x  
134 slower speed).

135

136 **References**

- 137 1. G. Fan, et al., Hierarchical porous carbon nanofibrous membranes with an  
138 enhanced shape memory property for effective adsorption of proteins. *RSC Adv.*  
139 **5**, 64318–64325 (2015).
- 140 2. S. J. Park, et al., Surface Engineering of Triboelectric Nanogenerator with an  
141 Electrodeposited Gold Nanoflower Structure. *Sci. Rep.* **5**, 13866 (2015).

142
